# Supplementary material
Source: ML conference proceedings conference paper supplement (https://openaccess.thecvf.com/content/CVPR2026/html/Wang_PoInit-of-View_Poisoning_Initialization_CVPR_2026_paper.html)
Supplement: Supplementary file 1 [file Wang_PoInit-of-View_Poisoning_Initialization_CVPR_2026_supplemental.pdf]

# PoInit-of-View: Poisoning Initialization of Views Transfers Across Multiple 3D Reconstruction Systems

## Supplementary Material

This appendix provides additional theoretical analysis and derivation, more empirical proof, and ablation results for PoInit-of-View. It is organized into two main sections:

- Section A provides the proofs of theoretical analysis.
- Section B provides more ablations of hyperparameters and defense discussion.

### A. Proofs of Theoretical Results

This section establishes how pixel-level perturbations propagate through cross-view gradients, descriptor representations, and ultimately the robustness of Structure-from-Motion (SfM).

#### A.1. From Cross-View Inconsistency to Descriptor Divergence

Let  $R_i$  be a clean reference image and  $A_j$  a poisoned one with perturbation  $\delta$ . Applying the Sobel operator gives

$$G(A_j) = G(R_j + \delta) = G(R_j) + J\delta, \quad (12)$$

where  $J$  is the Sobel Jacobian. Under bounded-smoothness,

$$\|G(R_i) - G(R_j)\|_1 \leq \tau_g, \quad (13)$$

and since Sobel is linear,

$$c_s^{\min} \|\delta\|_1 \leq \|J\delta\|_1 \leq c_s^{\max} \|\delta\|_1. \quad (14)$$

Thus,

$$\tau_g + c_s^{\min} \|\delta\|_1 \leq \text{LCVI} \leq \tau_g + c_s^{\max} \|\delta\|_1. \quad (15)$$

Local descriptors such as SIFT/RootSIFT are piecewise linear under fixed orientation-bin assignments. Therefore, within a small radius  $r > 0$ , the descriptor mapping is bi-Lipschitz:

$$L_r^{\min} \|G_1 - G_2\|_1 \leq \|\phi(G_1) - \phi(G_2)\|_2 \leq L_r^{\max} \|G_1 - G_2\|_1. \quad (16)$$

Since  $\|\delta\|_\infty \leq \epsilon$ , the perturbed gradients remain in this local region, giving

$$\|\phi(G(R_i)) - \phi(G(A_j))\|_2 \geq L_r^{\min} \text{LCVI} = \beta_r \text{LCVI}. \quad (17)$$

#### A.2. From Descriptor Divergence to Matching Probability

Empirically (see Figure 9), the descriptor deviation  $D = \|\phi(G_1) - \phi(G_2)\|_2$  follows a sub-exponential tail, so for some  $\alpha > 0$ ,

$$\Pr[D < \tau_d] \leq \exp(-\alpha D). \quad (18)$$

Combining this with the previous lower bound  $D \geq \beta_r \Delta$  (where  $\Delta = \text{LCVI} - \tau_g$ ) yields

$$p_{\text{match}} \leq \exp(-\alpha \beta_r \Delta), \quad (19)$$

showing that correspondence reliability decays exponentially with cross-view inconsistency.

Let the inlier count be  $M \sim \text{Binomial}(N, p_{\text{match}})$ . Chernoff bound states that for any  $0 < \epsilon < 1$ ,

$$\Pr[M \leq (1 - \epsilon)Np_{\text{match}}] \leq \exp(-\frac{1}{2}\epsilon^2 Np_{\text{match}}). \quad (20)$$

Hence the failure probability satisfies

$$\Pr[\eta < \eta_{\min}] \geq 1 - \exp(-\frac{1}{2}\epsilon^2 Np_{\text{match}}). \quad (21)$$

#### A.3. From Matching Probability to SfM Breakdown

SfM accepts a view-pair only if  $\eta \geq \eta_{\min}$ . If a critical pose-graph edge satisfies

$$\|G(R_i) - G(A_j)\|_1 \geq \tau_g + \frac{\tau_d}{\beta_r} + \Delta, \quad (22)$$

then its matching probability obeys the exponential decay in Section B.2.

Using the union bound over  $m$  critical edges (independence not required), the probability that at least one edge fails is

$$\Pr[\text{SfM fails}] \geq 1 - m \exp(-\frac{1}{2}\epsilon^2 Np_{\text{match}}). \quad (23)$$

Thus, SfM fails with overwhelming probability whenever the cross-view inconsistency exceeds

$$L_{\text{th}} = \tau_g + \frac{\tau_d}{\beta_r}. \quad (24)$$

This threshold closely matches the empirical collapse point observed in Figure 9 of the main paper. We provide the empirical estimation of  $(\beta_r, \tau_d, \tau_g)$  and the resulting threshold  $L_{\text{th}}$  in Section B.2.

## B. Additional Experiments

### B.1. Complete Results on All Datasets

Table 6 and Table 7 illustrate the distinct impact of PoInit-of-View attacks on synthetic versus real-world scenes. In NeRF-Synthetic Table 6, scenes are rendered under fully controlled conditions with consistent illumination, texture, and geometry. Feature correspondences are stable and the overall parallax is limited, making SfM relatively robust.

Table 6. Clean vs. Poisoned comparison across reconstruction pipelines on *Blender (NeRF-Synthetic)* with  $\rho = 16/255$ . Clean results in black; poisoned results in **parentheses**.

| Scene                | Colmap               |                      |                      | Instant NGP          |                      |                      | Mip-Splatting        |                      |                      |
|----------------------|----------------------|----------------------|----------------------|----------------------|----------------------|----------------------|----------------------|----------------------|----------------------|
|                      | PSNR $\uparrow$      | SSIM $\uparrow$      | LPIPS $\downarrow$   | PSNR $\uparrow$      | SSIM $\uparrow$      | LPIPS $\downarrow$   | PSNR $\uparrow$      | SSIM $\uparrow$      | LPIPS $\downarrow$   |
| lego                 | 12.31 (10.52)        | 0.776 (0.688)        | 0.220 (0.276)        | 35.65 (31.23)        | 0.981 (0.894)        | 0.020 (0.024)        | 35.45 (32.10)        | 0.982 (0.910)        | 0.021 (0.025)        |
| drums                | 8.06 (6.90)          | 0.657 (0.579)        | 0.296 (0.364)        | 24.57 (21.46)        | 0.930 (0.842)        | 0.109 (0.131)        | 26.14 (23.33)        | 0.953 (0.882)        | 0.046 (0.055)        |
| figus                | 15.12 (12.86)        | 0.838 (0.744)        | 0.143 (0.178)        | 30.29 (26.58)        | 0.972 (0.895)        | 0.031 (0.037)        | 35.12 (31.53)        | 0.988 (0.923)        | 0.013 (0.016)        |
| hotdog               | 12.21 (10.37)        | 0.831 (0.744)        | 0.195 (0.234)        | 37.02 (32.63)        | 0.982 (0.900)        | 0.037 (0.045)        | 37.78 (33.72)        | 0.985 (0.915)        | 0.028 (0.033)        |
| materials            | 14.56 (12.36)        | 0.802 (0.708)        | 0.193 (0.238)        | 28.96 (25.15)        | 0.944 (0.861)        | 0.069 (0.083)        | 30.12 (26.64)        | 0.960 (0.893)        | 0.044 (0.052)        |
| mic                  | 9.29 (7.99)          | 0.765 (0.686)        | 0.182 (0.221)        | 35.41 (31.23)        | 0.989 (0.900)        | 0.016 (0.019)        | 35.55 (31.84)        | 0.991 (0.917)        | 0.008 (0.010)        |
| ship                 | 10.02 (8.62)         | 0.616 (0.548)        | 0.335 (0.420)        | 30.61 (26.66)        | 0.892 (0.816)        | 0.136 (0.164)        | 30.78 (27.39)        | 0.904 (0.843)        | 0.132 (0.158)        |
| chair                | 15.42 (13.01)        | 0.847 (0.764)        | 0.148 (0.179)        | 35.07 (30.58)        | 0.984 (0.900)        | 0.023 (0.028)        | 35.70 (31.71)        | 0.986 (0.914)        | 0.018 (0.022)        |
| <b>Average</b>       | <b>12.12 (10.06)</b> | <b>0.766 (0.684)</b> | <b>0.214 (0.274)</b> | <b>32.20 (28.19)</b> | <b>0.959 (0.891)</b> | <b>0.055 (0.067)</b> | <b>33.33 (29.46)</b> | <b>0.969 (0.903)</b> | <b>0.039 (0.046)</b> |
| <b>Avg. Drop (%)</b> | <b>-17.0 %</b>       | <b>-10.7 %</b>       | <b>+28.0 %</b>       | <b>-12.4 %</b>       | <b>-7.1 %</b>        | <b>+21.4 %</b>       | <b>-11.6 %</b>       | <b>-6.8 %</b>        | <b>+19.0 %</b>       |

Table 7. Clean vs. Poisoned comparison across reconstruction pipelines on *Mip-NeRF 360 Dataset* with  $\rho = 16/255$ . Clean results in black; poisoned results in **parentheses**.

| Scene                | Colmap               |                      |                      | Instant NGP          |                      |                      | Mip-Splatting        |                      |                      |
|----------------------|----------------------|----------------------|----------------------|----------------------|----------------------|----------------------|----------------------|----------------------|----------------------|
|                      | PSNR $\uparrow$      | SSIM $\uparrow$      | LPIPS $\downarrow$   | PSNR $\uparrow$      | SSIM $\uparrow$      | LPIPS $\downarrow$   | PSNR $\uparrow$      | SSIM $\uparrow$      | LPIPS $\downarrow$   |
| garden               | 18.87 (14.66)        | 0.468 (0.411)        | 0.477 (0.566)        | 24.78 (19.70)        | 0.654 (0.587)        | 0.346 (0.435)        | 27.47 (22.52)        | 0.869 (0.794)        | 0.124 (0.199)        |
| bicycle              | 18.29 (14.21)        | 0.352 (0.309)        | 0.644 (0.764)        | 23.00 (18.30)        | 0.526 (0.472)        | 0.489 (0.616)        | 25.25 (20.71)        | 0.765 (0.698)        | 0.243 (0.389)        |
| flowers              | 14.50 (11.27)        | 0.257 (0.226)        | 0.634 (0.753)        | 20.54 (16.32)        | 0.462 (0.414)        | 0.478 (0.602)        | 21.60 (17.71)        | 0.605 (0.553)        | 0.371 (0.594)        |
| treehill             | 15.73 (12.22)        | 0.340 (0.299)        | 0.726 (0.862)        | 22.36 (17.78)        | 0.528 (0.473)        | 0.526 (0.662)        | 22.65 (18.57)        | 0.633 (0.578)        | 0.381 (0.611)        |
| stump                | 19.65 (15.27)        | 0.366 (0.322)        | 0.646 (0.767)        | 23.84 (18.95)        | 0.590 (0.530)        | 0.439 (0.552)        | 26.64 (21.85)        | 0.774 (0.707)        | 0.251 (0.402)        |
| kitchen              | 17.35 (13.48)        | 0.497 (0.437)        | 0.575 (0.683)        | 29.02 (23.07)        | 0.844 (0.757)        | 0.255 (0.321)        | 31.25 (25.63)        | 0.926 (0.845)        | 0.155 (0.248)        |
| bonsai               | 14.06 (10.92)        | 0.548 (0.482)        | 0.586 (0.696)        | 30.30 (24.09)        | 0.890 (0.798)        | 0.295 (0.371)        | 31.96 (26.21)        | 0.941 (0.860)        | 0.254 (0.407)        |
| counter              | 15.04 (11.69)        | 0.549 (0.483)        | 0.520 (0.617)        | 26.56 (21.13)        | 0.812 (0.728)        | 0.373 (0.469)        | 29.04 (23.81)        | 0.907 (0.828)        | 0.258 (0.413)        |
| room                 | 16.55 (12.86)        | 0.628 (0.552)        | 0.505 (0.599)        | 29.16 (23.19)        | 0.850 (0.764)        | 0.383 (0.482)        | 31.54 (25.86)        | 0.918 (0.839)        | 0.286 (0.458)        |
| <b>Average</b>       | <b>16.67 (13.11)</b> | <b>0.445 (0.391)</b> | <b>0.590 (0.700)</b> | <b>25.51 (20.27)</b> | <b>0.684 (0.612)</b> | <b>0.398 (0.501)</b> | <b>27.49 (22.54)</b> | <b>0.815 (0.744)</b> | <b>0.258 (0.414)</b> |
| <b>Avg. Drop (%)</b> | <b>-22.3 %</b>       | <b>-12.1 %</b>       | <b>+18.7 %</b>       | <b>-20.5 %</b>       | <b>-10.3 %</b>       | <b>+25.9 %</b>       | <b>-18.0 %</b>       | <b>-8.7 %</b>        | <b>+60.2 %</b>       |

Consequently, although PoInit-of-View introduces cross-view inconsistencies, all reconstruction pipelines exhibit only moderate degradation in PSNR/SSIM and a small increase in LPIPS.

In contrast, Mip-NeRF360 Table 7 contains real photographic data with large-baseline viewpoints, complex textures, and significant illumination variations. These factors naturally weaken feature stability and make SfM more susceptible to matching errors. Under such conditions, the cross-view perturbations injected by PoInit-of-View are amplified during triangulation and bundle adjustment, resulting in larger pose drift and geometric distortion. This leads to substantially more severe performance drops across all pipelines, as reflected by stronger declines in PSNR/SSIM and pronounced increases in LPIPS. Overall, the two tables jointly demonstrate that while PoInit-of-View has limited influence in idealized synthetic settings, its impact is significantly amplified in real, visually complex environments, causing much stronger degradation in both SfM and neural rendering pipelines. As shown in Figure 10, to estimate the upper bound of our method on SfM statistics, we manually mask keypoints and remove all pixel-level structural features.

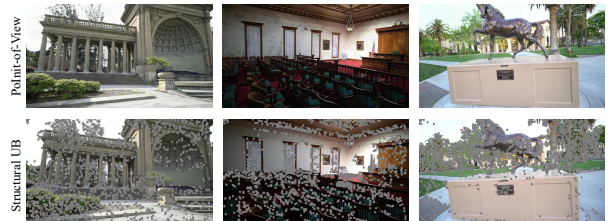

Figure 10. Comparison between regular PoInit-of-View inputs (top row) and our Structural Upper Bound setting (bottom row). In the Structural Upper Bound setting, we manually mask keypoints and remove all pixel-level structural features to estimate the upper bound of our method on SfM statistics. This produces purely structure-free imagery, isolating the impact of structural cues on reconstruction.

## B.2. Estimation of the Breakdown Threshold

We estimate the breakdown threshold  $L_{th}$

$$L_{th} = \tau_g + \frac{\tau_d}{\beta_r}. \quad (25)$$

purely from statistics of the clean SfM reconstruction.

**Step 1: Estimating  $\tau_g$ .** From the clean COLMAP reconstruction, we collect all verified keypoint correspondences  $(p_i, p_j)$  on the Tanks & Temples benchmark. For each correspondence, we extract aligned patches around  $p_i$  and  $p_j$  and compute Sobel gradients  $G(I_i(p_i))$  and  $G(I_j(p_j))$ . We measure the gradient discrepancy

$$d_g = \|G(I_i(p_i)) - G(I_j(p_j))\|_1, \quad (26)$$

and define  $\tau_g$  as the empirical mean of  $d_g$  over all clean correspondences.

**Step 2: Estimating  $\tau_d$ .** Using the same set of correspondences, we compute descriptor distances

$$d_d = \|\phi(I_i(p_i)) - \phi(I_j(p_j))\|_2. \quad (27)$$

We sort all  $d_d$  and set  $\tau_d$  to the 5-th percentile of this distribution, which yields a conservative descriptor tolerance under clean matching.

**Step 3: Estimating  $\beta_r$ .** We randomly sample  $K$  clean patch pairs  $(G_1, G_2)$  and compute

$$r = \frac{\|\phi(G_1) - \phi(G_2)\|_2}{\|G_1 - G_2\|_1}. \quad (28)$$

We then define

$$\beta_r = \mathbb{E}[r]. \quad (29)$$

Finally, we plug the three quantities into

$$L_{\text{th}} = \tau_g + \frac{\tau_d}{\beta_r}. \quad (30)$$

The predicted SfM breakdown threshold

$$L_{\text{th}} = \tau_g + \tau_d/\beta_r$$

evaluates to  $\approx 0.26$  on Tanks & Temples as shown in Figure 9. We provide the pseudo-code for the estimation of the breakdown threshold in Algorithm 2.

### B.3. More Ablations for Hyperparameters

**Ablations for  $T$ .** As shown in Figure 11-(a), increasing the PGD steps  $T$  strengthens the attack only up to  $T \approx 15$ . Beyond this point, both  $\mathcal{L}_{\text{CVI}}$  and the collapse ratio saturate, indicating that PoInit-of-View does not rely on excessive optimization steps but rather on crossing the theoretical threshold  $L_{\text{th}}$ .

**Ablations for  $\alpha$ .** As shown in Figure 11-(b), we sweep the PGD step size  $\alpha \in \{0.5, 1, 2, 4\}/255$ . Small step sizes under-optimize the inconsistency objective and lead to limited changes in cross-view gradients. Moderate values (e.g.,  $\alpha = 2/255$ ) maximize the growth of  $\mathcal{L}_{\text{CVI}}$  and yield the strongest collapse. Larger step sizes cause optimization overshoot and introduce high-frequency artifacts without improving cross-view inconsistency.

---

### Algorithm 2 Estimating $\tau_g, \tau_d, \beta_r$ , and $L_{\text{th}}$ from clean data

---

**Require:** Clean input images  $\{I_i\}$ ; COLMAP verified correspondences  $\mathcal{M}$

**Ensure:** Estimated  $\tau_g, \tau_d, \beta_r$ , and final threshold  $L_{\text{th}}$

- 1: **Step 1: Initialize statistics containers**
  - 2:  $\mathcal{G} \leftarrow []$  {Stores all gradient differences  $d_g$ }
  - 3:  $\mathcal{D} \leftarrow []$  {Stores all descriptor differences  $d_d$ }
  - 4:  $\mathcal{R} \leftarrow []$  {Stores all ratios  $r = d_d/d_g$ }
  - 5: **Step 2: Process each verified correspondence**
  - 6: **for all**  $(i, j, k) \in \mathcal{M}$  **do**
  - 7:   Extract aligned patches  $P_i^{(k)}, P_j^{(k)}$  (size  $11 \times 11$ )  
    {Local neighborhoods around matched keypoints}
  - 8:   Compute Sobel gradients:  $G_i^{(k)} = G(P_i^{(k)})$ ,  $G_j^{(k)} = G(P_j^{(k)})$
  - 9:    $d_g^{(k)} = \|G_i^{(k)} - G_j^{(k)}\|_1$
  - 10:   Append  $d_g^{(k)}$  to  $\mathcal{G}$
  - 11:    $d_d^{(k)} = \|\phi_i^{(k)} - \phi_j^{(k)}\|_2$
  - 12:   Append  $d_d^{(k)}$  to  $\mathcal{D}$
  - 13:   **if**  $d_g^{(k)} > 10^{-4}$  **then**
  - 14:     Compute ratio  $r^{(k)} = d_d^{(k)}/d_g^{(k)}$
  - 15:     Append  $r^{(k)}$  to  $\mathcal{R}$
  - 16:   **end if**
  - 17: **end for**
  - 18: **Step 3: Aggregate statistics**
  - 19: Remove top 1% of  $\mathcal{G}$  {Filter out rare extreme gradients}
  - 20:  $\tau_g \leftarrow \text{mean}(\mathcal{G})$  {Cross-view gradient level}
  - 21: Sort  $\mathcal{D}$
  - 22:  $\tau_d \leftarrow \text{Quantile}_{0.05}(\mathcal{D})$  {Descriptor tolerance}
  - 23: Remove top 5% of  $\mathcal{R}$
  - 24:  $\beta_r \leftarrow \text{mean}(\mathcal{R})$  {Descriptor–gradient sensitivity}
  - 25: **Step 4: Compute theoretical SfM breakdown threshold**
  - 26:  $L_{\text{th}} \leftarrow \tau_g + \tau_d/\beta_r$
  - 27: **return**  $\tau_g, \tau_d, \beta_r, L_{\text{th}}$
- 

**Ablations for  $r$ .** As shown in Figure 11-(c), we vary the poisoning ratio  $r \in \{0.1, 0.3, 0.6, 1.0\}$ . When only 10% of views are poisoned, SfM remains largely stable. At  $r = 0.3$ , we observe noticeable degradation, while  $r = 0.6$  (our default) offers the best trade-off between attack effectiveness and perceptual quality. Increasing to  $r = 1.0$  yields only marginal additional gain, demonstrating that PoInit-of-View does not require poisoning all input views.

### B.4. Additional Low-Cost Defenses

**Structure Randomization (Patch Masking).** Randomly replace  $\sim 5\%$  of  $16 \times 16$  patches with local blur; helps but may reduce keypoint density.

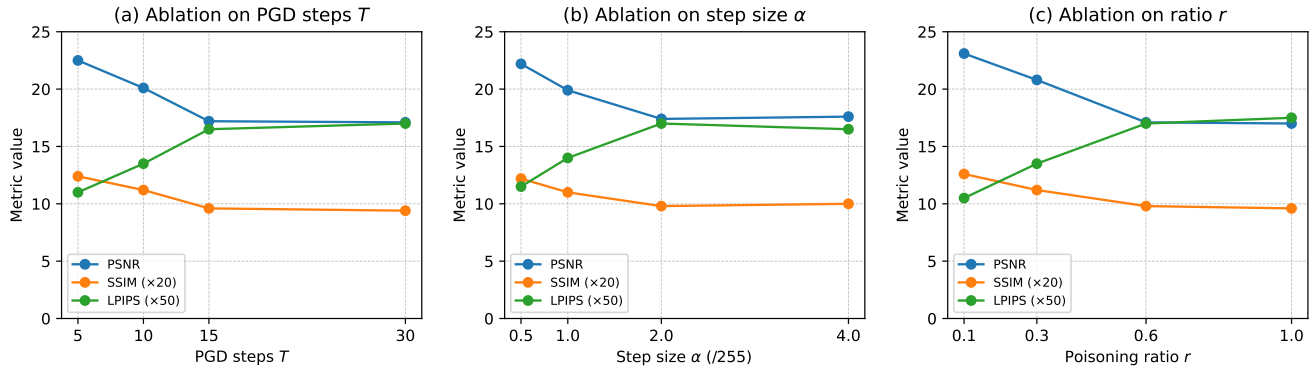

Figure 11. Ablation studies on hyperparameters  $T$ ,  $\alpha$ , and  $r$ . Higher PSNR/SSIM indicates better reconstruction; lower LPIPS indicates more perceptual degradation.

Table 8. Extended defense comparison on Tanks & Temples (T&T). Higher values indicate better defense. *PoInit-of-View* remains effective against defenses.

| Defense       | Reg. Imgs $\uparrow$ | Triang. Pts (k) $\uparrow$ | 3D Pts (M) $\uparrow$ |
|---------------|----------------------|----------------------------|-----------------------|
| None          | 11.2                 | 4.8                        | 0.10                  |
| Patch Masking | 28.5                 | 13.2                       | 0.23                  |
| JPEG (q=85)   | 36.9                 | 17.0                       | 0.29                  |
| Color Jitter  | 22.7                 | 10.1                       | 0.18                  |
| Clean         | 87.3                 | 67.6                       | 2.37                  |

**Photometric Normalization (Color Jitter).** Small random brightness/contrast/saturation/hue; modest gains mostly against photometric-only poisons.

Table 8 shows that *PoInit-of-View* significantly degrades SfM, reducing registered views to only 11.2 without any protection. Among lightweight defenses, JPEG compression is the most effective, nearly tripling the number of registered images by suppressing the high-frequency cross-view inconsistencies introduced by our attack. Patch Masking also improves robustness by weakening corrupted local structures, while Color Jitter provides only modest gains since *PoInit-of-View* primarily exploits geometric, rather than photometric, cues. Overall, simple preprocessing can partially mitigate *PoInit-of-View*, but a substantial gap remains compared to clean performance.

### B.5. Modern Learned Descriptors

As shown in Table 9, to verify the cross-model generalizability of our attack, we extend our evaluation beyond the standard SIFT (Colmap) initializer to modern learned descriptors. We focus on SIFT (Colmap) as it is widely used as a standard SfM initializer in many reconstruction pipelines. Additionally, we replace SIFT with two well-known learned descriptors, SuperPoint+SuperGlue (SP+SG) [34] and LoFTR [39], via the widely used hierarchical localization toolbox (HLOC), while keeping the remaining SfM backend unchanged. Results on all T&T

below confirm that our attack still yields substantial degradation, although learned descriptors are more robust than SIFT.

Table 9. Effect of poisoning on different descriptors in SfM reconstruction.

| Descriptors | Setting    | Reg.%     | Triang.(k) | 3D Pts(M) | Collapse |
|-------------|------------|-----------|------------|-----------|----------|
| SIFT        | Clean/Poi. | 93.5/24.3 | 73.6/13.7  | 3.07/0.41 | 0.88     |
| SP+SG       | Clean/Poi. | 95.8/46.7 | 81.4/31.2  | 3.32/1.05 | 0.62     |
| LoFTR       | Clean/Poi. | 96.6/54.9 | 84.9/36.8  | 3.45/1.22 | 0.55     |

### B.6. Collapse Ratio

As shown in Figure 12, to provide an intuitive understanding of our proposed evaluation metric, we conduct a qualitative ablation on the Collapse Ratio. Figure 12 visualizes the 3D reconstruction outcomes across varying collapse ratios (0.15, 0.33, and 0.81) alongside the clean baseline. As shown, there is a clear correlation between the metric and the visual integrity of the scene: a larger collapse ratio consistently translates to more severe structural degradation. Notably, at a high ratio of 0.81, the reconstruction is nearly entirely corrupted. This visualization confirms that the Collapse Ratio serves as a reliable and accurate indicator of the reconstruction quality and, consequently, the effectiveness of the attack.

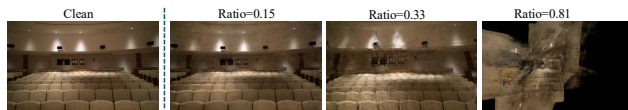

Figure 12. Visual effect of different collapse ratios on 3D reconstruction.

## B.7. Theory Indeed Guides the Attack Design

Our theory proves that the attack is guaranteed to succeed when  $\mathcal{L}_{\text{CVI}} > L_{th}$ . It directly motivates our attack design of maximizing  $\mathcal{L}_{\text{CVI}}$  (Eqs. (5)). In particular, **Appendix C.2** has derived  $L_{th} \approx 0.26$  on T&T dataset. The figure below confirms that PGD with our setting of 15 steps ( $\mathcal{L}_{\text{CVI}} = 0.28$ ) already satisfies the condition. Fig. 11(a) in **Appendix C.3.1** also confirms that the attack performance gets saturated at 15 steps.

## B.8. Minimum poisoned views & view selection

As shown in Table 10, we repeat the random selection of poisoned views 5 times. Results below show very small variances, which makes sense because the reconstruction is not expected to be biased towards specific views.

Table 10. Reconstruction results under five random poisoned-view selections, showing low variance.

| Poison        | Reg.%    | Triang.(k) | 3D Pts(M) | Collapse  |
|---------------|----------|------------|-----------|-----------|
| Rand. 5 times | 24.3±0.3 | 13.7±1.2   | 0.41±0.07 | 0.88±0.04 |

## B.9. Theory guides the attack design

As shown in Figure 13, our theory proves that the attack is guaranteed to succeed when  $\mathcal{L}_{\text{CVI}} > L_{th}$ . It directly motivates our attack design of maximizing  $\mathcal{L}_{\text{CVI}}$  (Eqs. (5)). In particular, **Appendix C.2** has derived  $L_{th} \approx 0.26$  on T&T dataset. The figure below confirms that PGD with our setting of 15 steps ( $\mathcal{L}_{\text{CVI}} = 0.28$ ) already satisfies the condition. Fig. 11(a) in **Appendix C.3.1** also confirms that the attack performance gets saturated at 15 steps.

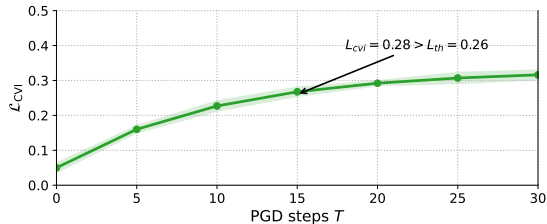

Figure 13. Cross-view inconsistency loss  $\mathcal{L}_{\text{CVI}}$  vs. PGD steps  $T$ . The loss increases steadily and surpasses the threshold at  $T = 15$ .
